# Supplementary material for: Estimating Sensitivities of Portfolio Credit Risk Using Monte Carlo
Source: Atypon-hosted journal article supplement (doi:10.1287/ijoc.2014.0602), 2014-06-27
Supplement: ijoc.2014.0602-sm-creditrisksensitivities_ecom_final.pdf [file ijoc.2014.0602-sm-creditrisksensitivities_ecom_final.pdf]

# Electronic Companion to “Estimating Sensitivities of Portfolio Credit Risk using Monte Carlo”

L. Jeff Hong

Department of Industrial Engineering and Logistics Management  
Hong Kong University of Science and Technology, Clear Water Bay, Hong Kong, China

Sandeep Juneja

School of Technology and Computer Science  
Tata Institute of Fundamental Research, Colaba Mumbai, India-400005

Jun Luo

Antai College of Economics and Management  
Shanghai Jiao Tong University, Shanghai 200052, China

## EC.1. Technical Remarks

*Proof of Corollary 1.* Let  $X(\theta) = \max_{i=1, \dots, k} X_i(\theta)$ . Then  $X(\theta)$  is non-differentiable when there exist some  $i \neq j$  such that  $X(\theta) = X_i(\theta) = X_j(\theta)$  or  $X_\ell(\theta)$  is non-differentiable for  $\ell = 1, 2, \dots, k$ . Because  $X_\ell(\theta)$  is differentiable w.p.1 and  $\Pr\{X_i(\theta) = X_j(\theta)\} = 0$ ,  $X(\theta)$  is also differentiable w.p.1 at any  $\theta \in \mathcal{N}(\theta_0)$ . Let  $\mathcal{K} = \sum_{i=1}^k \mathcal{K}_i$ . Then,  $\mathbb{E}[\mathcal{K}] < \infty$  and  $|X(\theta_0 + \Delta\theta) - X(\theta_0)| \leq \mathcal{K} \cdot |\Delta\theta|$  for any  $\Delta\theta$  that is close enough to 0.

Let  $i^* = \operatorname{argmax}_{i=1, \dots, k} X_i(\theta)$ . Then,  $X'(\theta) = X'_{i^*}(\theta)$  w.p.1. Note that

$$\begin{aligned} \psi(\theta, t) &= \mathbb{E}[X'(\theta); X(\theta) = t] = \mathbb{E}[X'_{i^*}(\theta); X_{i^*}(\theta) = t] = \sum_{i=1}^k \mathbb{E}[X'_i(\theta) \mathbf{1}_{\{i^*=i\}}; X_i(\theta) = t] \\ &= \sum_{i=1}^k \mathbb{E}\left[ X'_i(\theta) \prod_{j=1, j \neq i}^k \mathbf{1}_{\{X_j(\theta) < X_i(\theta)\}}; X_i(\theta) = t \right] = \sum_{i=1}^k \psi_i(\theta, t). \end{aligned}$$

Therefore,  $\psi(\theta, t)$  is continuous at  $(\theta_0, 0)$  because  $\psi_i(\theta, t)$  are continuous at  $(\theta_0, 0)$ . Then, the conclusion of this corollary follows directly from Lemma 1.

*Verification of Conditions (a1)–(a3).* We next verify that Conditions (a1)–(a3) in Section 3.1 imply the conditions of Theorem 1. Note that  $X_i(\theta) = \epsilon_i - \Upsilon_i(\theta)$  and  $\epsilon_i$  is a continuous random variable that is independent of all other variable factors, so Conditions 1 and 2 of Theorem 1 are satisfied. Furthermore, note that

$$\psi_i(\theta, y) = -\mathbb{E}\left[ \Upsilon'_i(\theta) \prod_{j=1, j \neq i}^m \mathbf{1}_{\{(-1)^{a_j} [\epsilon_j - \Upsilon_j(\theta)] < y\}}; \epsilon_i = \Upsilon_i(\theta) + y \right].$$

Let  $\boldsymbol{\xi}_i$  denote all random factors other than  $\epsilon_i$ . Note that  $\boldsymbol{\xi}_i$  and  $\epsilon_i$  are mutually independent, and  $\Upsilon_i(\theta)$  and  $\Upsilon'_i(\theta)$  are fully determined when  $\boldsymbol{\xi}_i$  is given. By conditioning on  $\boldsymbol{\xi}_i$ , we have

$$\psi_i(\theta, y) = -\mathbb{E}\left\{ \mathbb{E}\left[ \Upsilon'_i(\theta) \prod_{j=1, j \neq i}^m \mathbf{1}_{\{(-1)^{a_j} [\epsilon_j - \Upsilon_j(\theta)] < y\}}; \epsilon_i = \Upsilon_i(\theta) + y \mid \boldsymbol{\xi}_i \right] \right\}$$

$$\begin{aligned}
&= -\mathbb{E} \left[ \Upsilon'_i(\theta) \prod_{j=1, j \neq i}^m \mathbf{1}_{\{(-1)^{a_j} [\epsilon_j - \Upsilon_j(\theta)] < y\}} \cdot \mathbb{E} \left[ 1; \epsilon_i = \Upsilon_i(\theta) + y \mid \Upsilon_i(\theta) \right] \right] \\
&= -\mathbb{E} \left[ \Upsilon'_i(\theta) \prod_{j=1, j \neq i}^m \mathbf{1}_{\{(-1)^{a_j} [\epsilon_j - \Upsilon_j(\theta)] < y\}} \cdot f_{\epsilon_i}(\Upsilon_i(\theta) + y) \right], \tag{EC.1}
\end{aligned}$$

where Equation (EC.1) follows from Equation (2) and the independence between  $\epsilon_i$  and  $\Upsilon_i(\theta)$ . Given the conditions of the theorem, we can easily check that the term inside of the expectation of Equation (EC.1) is continuous w.p.1 with respect to  $(\theta, y)$  and is dominated by a random variable  $K_i B_i$  with a finite first moment. Then, by the dominated convergence theorem (Durrett 2005),  $\psi_i(\theta, y)$  is continuous in  $(\theta, y)$ , i.e., Condition 3 of Theorem 1 also holds. Therefore, the conclusion of Theorem 1 holds.

Then, by Theorem 1,

$$\begin{aligned}
p'(\theta) &= \sum_{i=1}^m \mathbb{E} \{ [g(L_{-i} + l_i) - g(L_{-i})] \cdot \Upsilon'_i(\theta); \epsilon_i = \Upsilon_i \} \\
&= \sum_{i=1}^m \mathbb{E} \{ [g(L_{-i} + l_i) - g(L_{-i})] \cdot \Upsilon'_i(\theta) \cdot f_{\epsilon_i}(\Upsilon_i) \},
\end{aligned}$$

where the last equation can be derived similar to Equation (EC.1).

*Derivation of the LR estimator in Section 5.3.* Since the parameter  $S_1(0)$  can be viewed as a distributional parameter under the discretization scheme in Equation (31), we now apply the conditioning technique in Hong and Liu (2010) to derive the LR estimator in Equation (32).

Let  $f_i(\cdot | s_{i-1})$  denote the conditional density function of  $\widehat{S}_1(t_i)$  given that  $\widehat{S}_1(t_{i-1}) = s_{i-1}$ ,  $i = 1, 2, \dots, k$ . By Equation (24),

$$f_1(x | S_1(0)) = \frac{1}{\sigma_1(0, S_1(0)) \sqrt{\Delta t}} \cdot \phi \left( \frac{x - S_1(0) - \mu_1(0, S_1(0)) \Delta t}{\sigma_1(0, S_1(0)) \sqrt{\Delta t}} \right),$$

where  $\phi(\cdot)$  is the density function of standard normal distribution. Then, the SF can be expressed as

$$\begin{aligned}
\text{SF} &= \frac{d}{dS_1(0)} \log \left( f_1 \left( \widehat{S}_1(t_1) | S_1(0) \right) \right) \\
&= \frac{\widehat{S}_1(t_1) - S_1(0) - \mu_1(0, S_1(0)) \Delta t}{\sigma_1(0, S_1(0)) \sqrt{\Delta t}} \cdot \left[ \frac{1}{\sigma_1(0, S_1(0)) \sqrt{\Delta t}} \left( 1 + \frac{d\mu_1(0, S_1(0))}{dS_1(0)} \right) \right. \\
&\quad \left. + \frac{\widehat{S}_1(t_1) - S_1(0) - \mu_1(0, S_1(0)) \Delta t}{\sigma_1^2(0, S_1(0)) \sqrt{\Delta t}} \cdot \frac{d\sigma_1(0, S_1(0))}{dS_1(0)} \right] - \frac{1}{\sigma_1(0, S_1(0))} \frac{d\sigma_1(0, S_1(0))}{dS_1(0)} \\
&= \frac{\left( \widehat{S}_1(t_1) - \kappa_1 \mu_1 \Delta t \right)^2 - \sigma_1^2 S_1(0) \Delta t - (1 - \kappa_1 \Delta t)^2 S_1^2(0)}{2\sigma_1^2 S_1^2(0) \Delta t}, \tag{EC.2}
\end{aligned}$$

where Equation (EC.2) is by plugging Equation (30) with  $i = 1$ . Then, the LR estimator is

$$p'(S_1(0)) = \mathbb{E}\{g(L) \cdot \text{SF}\} = \mathbb{E}\left\{g(L) \cdot \frac{\left(\widehat{S}_1(t_1) - \kappa_1 \mu_1 \Delta t\right)^2 - \sigma_1^2 S_1(0) \Delta t - (1 - \kappa_1 \Delta t)^2 S_1^2(0)}{2\sigma_1^2 S_1^2(0) \Delta t}\right\}.$$

## EC.2. SPA Estimators in A Latent Variable Model

We now use Example 3 (The model of Bassamboo et al. (2008)) to derive SPA estimators. We consider only the case that the performance function is  $g(L) = \mathbf{1}_{\{L > y\}}$ . In fact, it is not clear how to derive SPA estimators for general performance functions. Conditioning on  $\{Z, \mathcal{E}\}$ ,

$$\begin{aligned} \mathbb{E}[g(L)|Z, \mathcal{E}] &= \Pr\left\{\sum_{i=1}^m l_i \mathbf{1}_{\{Y_i \leq d_i\}} > y \mid Z, \mathcal{E}\right\} \\ &= \Pr\left\{\epsilon_1 \leq \frac{\theta d_1 \mathcal{E} - \rho Z}{\sqrt{1 - \rho^2}} \mid Z, \mathcal{E}\right\} \cdot \Pr\left\{\sum_{i=2}^m l_i \mathbf{1}_{\{Y_i \leq d_i\}} > y - l_1 \mid Z, \mathcal{E}\right\} \\ &\quad + \Pr\left\{\epsilon_1 > \frac{\theta d_1 \mathcal{E} - \rho Z}{\sqrt{1 - \rho^2}} \mid Z, \mathcal{E}\right\} \cdot \Pr\left\{\sum_{i=2}^m l_i \mathbf{1}_{\{Y_i \leq d_i\}} > y \mid Z, \mathcal{E}\right\}. \end{aligned}$$

We can recursively use the same approach to deal with  $\Pr\left\{\sum_{i=2}^m l_i \mathbf{1}_{\{Y_i \leq d_i\}} > y - l_1 \mid Z, \mathcal{E}\right\}$  and  $\Pr\left\{\sum_{i=2}^m l_i \mathbf{1}_{\{Y_i \leq d_i\}} > y \mid Z, \mathcal{E}\right\}$ . Then, after  $m$  iterations, we have

$$\mathbb{E}[g(L)|Z, \mathcal{E}] = \sum_{s \in \mathcal{S}(m)} \prod_{i \in s^1} F_{\epsilon_i} \left( \frac{\theta d_i \mathcal{E} - \rho Z}{\sqrt{1 - \rho^2}} \right) \cdot \prod_{i \in s^0} \bar{F}_{\epsilon_i} \left( \frac{\theta d_i \mathcal{E} - \rho Z}{\sqrt{1 - \rho^2}} \right) \cdot \mathbf{1}_{\{\sum_{i \in s^1} l_i > y\}}, \quad (\text{EC.3})$$

where  $F_{\epsilon_i}(\cdot)$  is the cumulative distribution function (cdf) of  $\epsilon_i$ ,  $\bar{F}_{\epsilon_i}(\cdot) = 1 - F_{\epsilon_i}(\cdot)$ , and  $\mathcal{S}(m) = \{0, 1\}^m$  with  $s^1$  denoting the set of default obligors and  $s^0$  denoting the set of non-default obligors. Because the closed-form expression in Equation (EC.3) is Lipschitz continuous, then we can apply SPA method to obtain a SPA estimator,

$$\begin{aligned} p'(\theta) &= \frac{\partial}{\partial \theta} \mathbb{E}\{\mathbb{E}[g(L)|Z, \mathcal{E}]\} = \mathbb{E}\left\{\frac{\partial}{\partial \theta} \mathbb{E}[g(L)|Z, \mathcal{E}]\right\} \\ &= \mathbb{E}\left\{\sum_{s \in \mathcal{S}(m)} \left[ \sum_{j \in s^1} f_{\epsilon_j} \left( \frac{\theta d_j \mathcal{E} - \rho Z}{\sqrt{1 - \rho^2}} \right) \cdot \frac{d_j \mathcal{E}}{\sqrt{1 - \rho^2}} \cdot \prod_{i \in s^1, i \neq j} F_{\epsilon_i} \left( \frac{\theta d_i \mathcal{E} - \rho Z}{\sqrt{1 - \rho^2}} \right) \right. \right. \\ &\quad \cdot \prod_{i \in s^0} \bar{F}_{\epsilon_i} \left( \frac{\theta d_i \mathcal{E} - \rho Z}{\sqrt{1 - \rho^2}} \right) \cdot \mathbf{1}_{\{\sum_{i \in s^1} l_i > y\}} - \sum_{j \in s^0} f_{\epsilon_j} \left( \frac{\theta d_j \mathcal{E} - \rho Z}{\sqrt{1 - \rho^2}} \right) \cdot \frac{d_j \mathcal{E}}{\sqrt{1 - \rho^2}} \\ &\quad \left. \left. \cdot \prod_{i \in s^1} F_{\epsilon_i} \left( \frac{\theta d_i \mathcal{E} - \rho Z}{\sqrt{1 - \rho^2}} \right) \cdot \prod_{i \in s^0, i \neq j} \bar{F}_{\epsilon_i} \left( \frac{\theta d_i \mathcal{E} - \rho Z}{\sqrt{1 - \rho^2}} \right) \cdot \mathbf{1}_{\{\sum_{i \in s^1} l_i > y\}} \right] \right\}. \quad (\text{EC.4}) \end{aligned}$$

Similarly, by conditioning on  $\{\mathcal{E}, \epsilon_1, \dots, \epsilon_m\}$ , we know that

$$\begin{aligned} \mathbb{E}[g(L)|\mathcal{E}, \epsilon_1, \dots, \epsilon_m] &= \sum_{s \in \mathcal{S}(m)} \Pr \left\{ \bigcup_{i \in s^1} \left\{ Z \leq \frac{\theta d_i \mathcal{E} - \sqrt{1 - \rho^2} \epsilon_i}{\rho} \right\} \right. \\ &\quad \left. \bigcup_{i \in s^0} \left\{ Z > \frac{\theta d_i \mathcal{E} - \sqrt{1 - \rho^2} \epsilon_i}{\rho} \right\} \middle| \mathcal{E}, \epsilon_1, \dots, \epsilon_m \right\} \cdot \mathbf{1}_{\{\sum_{i \in s^1} l_i > y\}} \\ &= \sum_{s \in \mathcal{S}(m)} \left[ F_Z \left( \frac{\theta d_{i_*^1} \mathcal{E} - \sqrt{1 - \rho^2} \epsilon_{i_*^1}}{\rho} \right) - F_Z \left( \frac{\theta d_{i_*^0} \mathcal{E} - \sqrt{1 - \rho^2} \epsilon_{i_*^0}}{\rho} \right) \right] \\ &\quad \cdot \mathbf{1}_{\{\theta d_{i_*^1} \mathcal{E} - \sqrt{1 - \rho^2} \epsilon_{i_*^1} > \theta d_{i_*^0} \mathcal{E} - \sqrt{1 - \rho^2} \epsilon_{i_*^0}\}} \cdot \mathbf{1}_{\{\sum_{i \in s^1} l_i > y\}}, \end{aligned}$$

where  $i_*^1 = \operatorname{argmin}_{i \in s^1} \left\{ \frac{\theta d_i \mathcal{E} - \sqrt{1 - \rho^2} \epsilon_i}{\rho} \right\}$  and  $i_*^0 = \operatorname{argmax}_{i \in s^0} \left\{ \frac{\theta d_i \mathcal{E} - \sqrt{1 - \rho^2} \epsilon_i}{\rho} \right\}$ . Then,

$$\begin{aligned} p'(\theta) &= \mathbb{E} \left\{ \sum_{s \in \mathcal{S}(m)} \left[ f_Z \left( \frac{\theta d_{i_*^1} \mathcal{E} - \sqrt{1 - \rho^2} \epsilon_{i_*^1}}{\rho} \right) \cdot \frac{d_{i_*^1} \mathcal{E}}{\rho} - f_Z \left( \frac{\theta d_{i_*^0} \mathcal{E} - \sqrt{1 - \rho^2} \epsilon_{i_*^0}}{\rho} \right) \cdot \frac{d_{i_*^0} \mathcal{E}}{\rho} \right] \right. \\ &\quad \left. \cdot \mathbf{1}_{\{\theta d_{i_*^1} \mathcal{E} - \sqrt{1 - \rho^2} \epsilon_{i_*^1} > \theta d_{i_*^0} \mathcal{E} - \sqrt{1 - \rho^2} \epsilon_{i_*^0}\}} \cdot \mathbf{1}_{\{\sum_{i \in s^1} l_i > y\}} \right\} \quad (\text{EC.5}) \end{aligned}$$

There are several things we would like to point out. First, the reason we can easily derive multiple SPA estimators is because of the general closed-form expression in Equation (3) (also Equations (7) and (8) in Section 3), which implies the possibility of deriving SPA estimators under some transformations. In fact, if we write Equations (11) and (13) into the combinatorial form, we find that Equation (EC.4) is the same as Equation (11) and Equation (EC.5) is the same as Equation (13). Second, however, without the general form of Equation (3), it is not easy to convert Equations (EC.4) and (EC.5) into the neat form as in (11) and (13). Therefore, the computational complexity of both (EC.4) and (EC.5) are at least  $O(2^m)$ , which is much higher compared with their counterpart in (11) and (13) in the paper.

### EC.3. Extension to Sensitivities of VaR and CVaR

Our method can be extended to compute the sensitivity of VaR and Conditional VaR (CVaR) when  $l_i$  are mutually independent continuous random variables and independent with  $X_j$  for all  $i, j = 1, 2, \dots, m$ . Then the cdf  $F_L(\cdot)$  of the loss function  $L$  is continuous except at the point 0. In general, when computing the sensitivity of VaR or CVaR with respect  $L$ , we are interested in the event that the loss is beyond some large threshold  $y$  (which is typically greater than 0), so the discontinuity at 0 will not cause any problem. Note that if we restrict  $l_i$  to be constant, then  $L$  become a discrete random variable with cdf  $F_L(\cdot)$  be a step function. Then the sensitivity of the VaR or the CVaR may become hard to analyze since the perturbation of  $\theta$  may lead to a dramatic

change or no change of the value of VaR depending on whether the level  $\alpha$  (defined later on) is at an exact probability mass point or not. Interested readers may be referred to Rockafellar and Uryasev (2002) for representing the CVaR for general loss functions as an expectation of properly modified tail distribution.

Considering  $l_i$ ,  $i = 1, 2, \dots, m$ , as continuous random variables, then  $L$  is a continuous random variable except at the point 0, where  $\Pr(L = 0) = \Pr(X_i \geq 0, \text{ for all } i = 1, 2, \dots, m) > 0$ . Generally, when computing the sensitivity of VaR with respect to  $L$ , we are interested in the event that the loss is beyond some large threshold  $y$ , which is typically greater than 0.

### EC.3.1. The sensitivity of VaR

Let  $F_L(y) = \Pr(L \leq y)$  be the cdf of  $L$ . Define the VaR at level  $\alpha$  ( $\alpha$ -VaR) of  $L$  as  $v_\alpha = \inf\{y : F_L(y) \geq \alpha\}$ . Then for  $v_\alpha \neq 0$ , the equality can be achieved with  $F_L(v_\alpha) = \alpha$ . To estimate  $v'_\alpha(\theta)$ , we write  $F_L(v_\alpha) = \alpha$  as  $F_L(v_\alpha(\theta), \theta) = \alpha$  and take derivative with respect to  $\theta$  on both sides, which yields

$$\partial_y F_L(y, \theta)|_{y=v_\alpha(\theta)} \cdot v'_\alpha(\theta) + \partial_\theta F_L(y, \theta)|_{y=v_\alpha(\theta)} = 0.$$

Then,

$$v'_\alpha(\theta) = \frac{\partial_\theta F_L(y, \theta)}{\partial_y F_L(y, \theta)} \Big|_{y=v_\alpha(\theta)} = \frac{\partial_\theta F_L(y, \theta)}{f_L(y, \theta)} \Big|_{y=v_\alpha(\theta)}, \quad (\text{EC.6})$$

where  $f_L(y, \theta)$  denote the pdf of  $L$ . Then our goal is to calculate  $\partial_\theta F_L(v_\alpha(\theta), \theta)$  and  $f_L(v_\alpha(\theta), \theta)$  respectively. The numerator on the right-hand-side of Equation (EC.6)

$$\partial_\theta F_L(v_\alpha(\theta), \theta) = \frac{d}{d\theta} \mathbb{E} [\mathbf{1}_{\{L(\theta) \leq y\}}] \Big|_{y=v_\alpha(\theta)}. \quad (\text{EC.7})$$

Letting  $g(L) = \mathbf{1}_{\{L(\theta) \leq y\}}$ , then Equation (EC.7) can be handled by the conditional technique in Section 2. We just summarize the result as follows,

$$\frac{d}{d\theta} \mathbb{E} [\mathbf{1}_{\{L(\theta) \leq y\}}] \Big|_{y=v_\alpha(\theta)} = - \sum_{i=1}^m \mathbb{E} \{ [\mathbf{1}_{\{L_{-i} + l_i \leq y\}} - \mathbf{1}_{\{L_{-i} \leq y\}}] \cdot X'_i(\theta); X_i = 0 \} \Big|_{y=v_\alpha(\theta)},$$

where  $L_{-i} = \sum_{j=1, j \neq i}^m l_j \cdot \mathbf{1}_{\{X_j < 0\}}$ . The denominator on the right-hand-side of Equation (EC.6)

$$\begin{aligned} f_L(y, \theta) &= \lim_{\Delta y \rightarrow 0} \frac{F_L(y + \Delta y) - F_L(y)}{\Delta y} \\ &= \lim_{\Delta y \rightarrow 0} \frac{\mathbb{E} [\mathbf{1}_{\{L(\theta) \leq y + \Delta y\}} - \mathbf{1}_{\{L(\theta) \leq y\}}]}{\Delta y}. \end{aligned}$$

Then, we may choose a proper  $\Delta y$  to approximate  $f_L(y, \theta)$  at  $y = v_\alpha(\theta)$ , which can be viewed as the kernel method. Another way is to apply the conditional Monte Carlo derived in Fu et al. (2009). Basically, it requires to find some random variable  $Y(\theta)$  such that

$$F_L(y, \theta) = \mathbb{E}[\Pr\{L(\theta) \leq y | Y(\theta)\}] = \mathbb{E}[G(y, Y(\theta), \theta)],$$

where  $G(y, Y(\theta), \theta)$  is differential w.p.1 with respect to  $y$  and

$$|G(y + \Delta y, Y(\theta), \theta) - G(y, Y(\theta), \theta)| \leq K|\Delta y|, \quad (\text{EC.8})$$

for some random variable  $K$  with  $E[K] < \infty$ . Then,

$$f_L(y, \theta)|_{y=v_\alpha(\theta)} = E[\partial_y G(y, Y(\theta), \theta)]|_{y=v_\alpha(\theta)}. \quad (\text{EC.9})$$

The closed-form expression of  $G$  may be complicated, but the idea behind is straightforward. By conditioning on some random variable  $Y(\theta)$ , we can write  $F_L$  as an expectation of a function of cdf's and pdf's with closed-form. In addition, the condition of (EC.8) can be easily verified after giving the closed-form of  $G$  (which should be satisfied due to the differentiability of  $F_L$  at  $y = v_\alpha(\theta)$ ). Equations (EC.7) and (EC.9) together provide the estimator  $v'_\alpha(\theta)$  in Equation (EC.6). Now we derive a general closed-form expression of  $G$  given the form of loss function  $L$  in our paper. Suppose we may write  $X_i = \eta_i - A_i$ , where  $\eta_i$  is an idiosyncratic random variable which is independent of all other random variables. Let  $H_i(\cdot)$  and  $h_i(\cdot)$  be the cdf and pdf of  $\eta_i$ , respectively. Let  $F_i(\cdot)$  be the cdf of  $l_i$  and  $\bar{F}_i(\cdot) = 1 - F_i(\cdot)$ . Then,

$$F_L(y, \theta) = E \left[ \Pr \left\{ \sum_{i=1}^m l_i \cdot \mathbf{1}_{\{\eta_i < A_i\}} \leq y \mid A_1, A_2, \dots, A_m \right\} \right]. \quad (\text{EC.10})$$

For any  $y > 0$ ,

$$\begin{aligned} & \Pr \left\{ \sum_{i=1}^m l_i \cdot \mathbf{1}_{\{\eta_i < A_i\}} \leq y \mid A_1, A_2, \dots, A_m \right\} \\ &= \Pr \{ \eta_1 < A_1 \mid A_1 \} \cdot \Pr \left\{ l_1 \leq y - \sum_{i=2}^m l_i \cdot \mathbf{1}_{\{\eta_i < A_i\}} \mid A_2, A_3, \dots, A_m \right\} \\ & \quad + \Pr \{ \eta_1 \geq A_1 \mid A_1 \} \cdot \Pr \left\{ \sum_{i=2}^m l_i \cdot \mathbf{1}_{\{\eta_i < A_i\}} \leq y \mid A_2, A_3, \dots, A_m \right\} \\ &= F_1(A_1) \cdot E \left[ H_1 \left( y - \sum_{i=2}^m l_i \cdot \mathbf{1}_{\{\eta_i < A_i\}} \right) \mid A_2, A_3, \dots, A_m \right] \\ & \quad + \bar{F}_1(A_1) \cdot \Pr \left\{ \sum_{i=2}^m l_i \cdot \mathbf{1}_{\{\eta_i < A_i\}} \leq y \mid A_2, A_3, \dots, A_m \right\}. \end{aligned}$$

Recursively, we can use the same approach to analyze  $\Pr \left\{ \sum_{i=2}^m l_i \cdot \mathbf{1}_{\{\eta_i < A_i\}} \leq y \mid A_2, A_3, \dots, A_m \right\}$ . Then, after  $m$  iterations, we obtain that

$$\begin{aligned} & \Pr \left\{ \sum_{i=1}^m l_i \cdot \mathbf{1}_{\{\eta_i < A_i\}} \leq y \mid A_1, A_2, \dots, A_m \right\} \\ &= \sum_{i=1}^m \left\{ F_i(A_i) \cdot E \left[ H_i \left( y - \sum_{j=i+1}^m l_j \cdot \mathbf{1}_{\{\eta_j < A_j\}} \right) \mid A_{i+1}, A_{i+2}, \dots, A_m \right] \cdot \prod_{j=1}^{i-1} \bar{F}_j(A_j) \right\} \\ & \quad + \prod_{i=1}^m \bar{F}_i(A_i). \end{aligned}$$

By Equation (EC.10),

$$F_L(y) = \sum_{i=1}^m \mathbb{E} \left[ F_i(A_i) \cdot H_i \left( y - \sum_{j=i+1}^m l_j \cdot \mathbf{1}_{\{\eta_j < A_j\}} \right) \cdot \prod_{j=1}^{i-1} \bar{F}_j(A_j) \right] + \mathbb{E} \left[ \prod_{i=1}^m \bar{F}_i(A_i) \right].$$

Differentiating  $F_L(y)$  with respect to  $y$  yields

$$f_L(y) = \sum_{i=1}^m \mathbb{E} \left[ F_i(A_i) \cdot h_i \left( y - \sum_{j=i+1}^m l_j \cdot \mathbf{1}_{\{\eta_j < A_j\}} \right) \cdot \prod_{j=1}^{i-1} \bar{F}_j(A_j) \right].$$

### EC.3.2. The sensitivity of CVaR

According to Acerbi and Tasche (2002), the CVaR is equivalent to the expected shortfall (ES) when  $L$  is a real integrable random variable (i.e.,  $\mathbb{E}[|L|] < \infty$ ). In addition,  $L$  is continuous in the neighborhood of  $v_\alpha$  (which is the  $\alpha$ -VaR), then CVaR at level  $\alpha$  (denoted by  $\alpha$ -CVaR) of  $L$  is

$$u_\alpha = v_\alpha + \frac{1}{1-\alpha} \mathbb{E}[(L - v_\alpha); L \geq v_\alpha],$$

which is also known as the tail conditional expectation. We are interested to calculate  $u'_\alpha(\theta)$ . Note that  $\Pr\{L(\theta) = v_\alpha(\theta)\} = 0$ . If we want to use the Monte Carlo method in this paper, we need to re-derive  $p'(\theta)$  in Equation (6) in the paper since  $g(\cdot)$  is a function of  $\theta$  now. Moreover, we define  $g(x, \theta) = (x - v_\alpha(\theta)) \cdot \mathbf{1}_{\{x \geq v_\alpha(\theta)\}}$ , then  $\partial_\theta g(x, \theta) = -v'_\alpha(\theta) \cdot \mathbf{1}_{\{x \geq v_\alpha(\theta)\}}$  when  $v_\alpha(\theta) \neq x$ . We know that

$$p(\theta) = \sum_{s \in \mathcal{S}(m)} \mathbb{E} \left[ g \left( \sum_{i \in s^1} l_i \right) \right] \cdot \mathbb{E} \left[ \prod_{i \in s^1} \mathbf{1}_{\{X_i < 0\}} \prod_{i \in s^0} \mathbf{1}_{\{X_i \geq 0\}} \right].$$

Then,

$$\begin{aligned} p'(\theta) &= \sum_{s \in \mathcal{S}(m)} \mathbb{E} \left[ g' \left( \sum_{i \in s^1} l_i \right) \right] \cdot \mathbb{E} \left[ \prod_{i \in s^1} \mathbf{1}_{\{X_i < 0\}} \prod_{i \in s^0} \mathbf{1}_{\{X_i \geq 0\}} \right] \\ &\quad + \sum_{s \in \mathcal{S}(m)} \mathbb{E} \left[ g \left( \sum_{i \in s^1} l_i \right) \right] \cdot \frac{d}{d\theta} \mathbb{E} \left[ \prod_{i \in s^1} \mathbf{1}_{\{X_i(\theta) < 0\}} \prod_{i \in s^0} \mathbf{1}_{\{X_i(\theta) \geq 0\}} \right]. \\ &= -v'_\alpha(\theta) \sum_{s \in \mathcal{S}(m)} \mathbb{E} \left[ \mathbf{1}_{\{\sum_{i \in s^1} l_i \geq v_\alpha(\theta)\}} \right] \cdot \mathbb{E} \left[ \prod_{i \in s^1} \mathbf{1}_{\{X_i < 0\}} \prod_{i \in s^0} \mathbf{1}_{\{X_i \geq 0\}} \right] \\ &\quad + \sum_{s \in \mathcal{S}(m)} \mathbb{E} \left[ g \left( \sum_{i \in s^1} l_i \right) \right] \cdot \frac{d}{d\theta} \mathbb{E} \left[ \prod_{i \in s^1} \mathbf{1}_{\{X_i(\theta) < 0\}} \prod_{i \in s^0} \mathbf{1}_{\{X_i(\theta) \geq 0\}} \right] \\ &= -v'_\alpha(\theta) \mathbb{E} \left[ \mathbf{1}_{\{\sum_{i=1}^m l_i \mathbf{1}_{\{X_i < 0\}} \geq v_\alpha(\theta)\}} \right] - \sum_{i=1}^m \mathbb{E} \{ [g(L_{-i} + l_i) - g(L_{-i})] \cdot X'_i(\theta); X_i = 0 \} \\ &= -(1-\alpha)v'_\alpha(\theta) - \sum_{i=1}^m \mathbb{E} \{ [g(L_{-i} + l_i) - g(L_{-i})] \cdot X'_i(\theta); X_i = 0 \}. \end{aligned}$$

The sensitivity of  $\alpha$ -CVaR is

$$\begin{aligned} u'_\alpha(\theta) &= v'_\alpha(\theta) + \frac{1}{1-\alpha} \cdot \frac{d}{d\theta} \mathbb{E}[(L(\theta) - v_\alpha(\theta)); L(\theta) \geq v_\alpha(\theta)] \\ &= \frac{-1}{1-\alpha} \sum_{i=1}^m \mathbb{E} \left\{ [(L_{-i} + l_i) \cdot \mathbf{1}_{\{L_{-i} + l_i \geq v_\alpha(\theta)\}} - L_{-i} \cdot \mathbf{1}_{\{L_{-i} \geq v_\alpha(\theta)\}}] \cdot X'_i(\theta); X_i = 0 \right\}. \end{aligned}$$

If Assumptions 1–3 in Hong and Liu (2009) hold, then we can directly apply the result in Hong and Liu (2009) to obtain that

$$\begin{aligned} u'_\alpha(\theta) &= \frac{1}{1-\alpha} \mathbb{E} [L'(\theta) \cdot \mathbf{1}_{\{L(\theta) \geq v_\alpha(\theta)\}}] \\ &= \frac{1}{1-\alpha} \mathbb{E} \left[ \left( \sum_{i=1}^m l_i \cdot \mathbf{1}_{\{X_i(\theta) < 0\}} \right)' \cdot \mathbf{1}_{\{L(\theta) \geq v_\alpha(\theta)\}} \right] = 0, \end{aligned}$$

which is obviously wrong. This is because the Assumption 1 of Hong and Liu (2009) fails with respect the loss function  $L$  considered in our paper.

## References

- Acerbi, C. and D. Tasche. 2002. On the coherence of expected shortfall. *Journal of Banking and Finance*, 1487-1503.
- Bassamboo, A., S. Juneja and A. Zeevi. 2008. Portfolio credit risk with extremal dependence: Asymptotic analysis and efficient simulation. *Operations Research*, **56** 593-606.
- Durrett, R. 2005. *Probability: Theory and Examples*, Third Edition. Duxbury Press, Belmont.
- Hong, L. J. and G. Liu. 2009. Simulating sensitivities of conditional value-at-risk. *Management Science*, **55** 281-293.
- Hong, L. J. and G. Liu. 2010. Pathwise estimation of probability sensitivities through terminating and steady-state simulations. *Operations Research*, **58** 357-370.
- Rockafellar, R. T. and S. Uryasev. 2002. Conditional value-at-risk for general loss distributions. *Journal of Banking and Finance*, 1443-1471.
